1 **ciRS-7 exonic sequence is embedded in a long non-coding RNA locus**

2

3 Steven P. Barrett<sup>1¶</sup>, Kevin R. Parker<sup>2¶</sup>, Caroline Horn<sup>1</sup>, Miguel Mata<sup>3</sup>, Julia Salzman<sup>1,4\*</sup>

4

5 <sup>1</sup>Department of Biochemistry, Stanford University School of Medicine, Stanford, CA, USA

6

7 <sup>2</sup>Institute for Stem Cell Biology and Regenerative Medicine, Stanford University School of

8 Medicine, Stanford, CA, USA

9

10 <sup>3</sup>Department of Microbiology and Immunology, Stanford University School of Medicine,

11 Stanford, CA, USA

12

13 <sup>4</sup>Department of Biomedical Data Science, Stanford University School of Medicine, Stanford,

14 CA, USA

15

16 \*correspondence to:

17 [julia.salzman@stanford.edu](mailto:julia.salzman@stanford.edu)

18

19 ¶These authors contributed equally to this work.

20

21

## 22 **Abstract**

23 ciRS-7 is an intensely studied, highly expressed and conserved circRNA. Essentially nothing is  
24 known about its biogenesis, including the location of its promoter. A prevailing assumption has  
25 been that ciRS-7 is an exceptional circRNA because it is transcribed from a locus lacking any  
26 mature linear RNA transcripts of the same sense. Our interest in the biogenesis of ciRS-7 led  
27 us to develop an algorithm to define its promoter. This approach predicted that the human ciRS-  
28 7 promoter coincides with that of the long non-coding RNA, LINC00632. We validated this  
29 prediction using multiple orthogonal experimental assays. We also used computational  
30 approaches and experimental validation to establish that ciRS-7 exonic sequence is embedded  
31 in linear transcripts that are flanked by cryptic exons in both human and mouse. Together, this  
32 experimental and computational evidence generate a new view of regulation in this locus: (a)  
33 ciRS-7 is like other circRNAs, as it is spliced into linear transcripts; (b) expression of ciRS-7 is  
34 primarily determined by the chromatin state of LINC00632 promoters; (c) transcription and  
35 splicing factors sufficient for ciRS-7 biogenesis are expressed in cells that lack detectable ciRS-  
36 7 expression. These findings have significant implications for the study of the regulation and  
37 function of ciRS-7, and the analytic framework we developed to jointly analyze RNA-seq and  
38 ChIP-seq data reveal the potential for genome-wide discovery of important biological regulation  
39 missed in current reference annotations.

40

## 41 **Author Summary**

42

43 circRNAs were recently discovered to be a significant product of 'host' gene expression  
44 programs but little is known about their transcriptional regulation. Here, we have studied the  
45 expression of a well-known circRNA named ciRS-7. ciRS-7 has an unusual function for a  
46 circRNA; it is believed to be a miRNA sponge. Previously, ciRS-7 was thought to be transcribed

47 from a locus lacking any mature linear isoforms, unlike all other circular RNAs known to be  
48 expressed in human cells. However, we have found this to be false; using a combination of  
49 bioinformatic and experimental genetic approaches, in both human and mouse, we discovered  
50 that linear transcripts containing the ciRS-7 exonic sequence, linking it to upstream genes. This  
51 suggests the potential for additional functional roles of this important locus and provides critical  
52 information to begin study on the biogenesis of ciRS-7.

53

## 54 **Introduction**

55 Until recently, the expression of circRNA was almost completely uncharacterized, with a few  
56 important exceptions [1–4]. It is now appreciated that circRNAs are a ubiquitous feature of  
57 eukaryotic gene expression [1,3,5,6]. While many functions have been posited for circRNAs,  
58 few have been supported with experimental evidence. ciRS-7, one of the most highly expressed  
59 and most intensely studied circRNAs, is an exception to this rule, where recent work has shown  
60 it functions as a miRNA sponge [6,7]. The sequence of ciRS-7 is highly repetitive with over 70  
61 repeated miR-7 seed sequences in humans, most of which are conserved across eutherian  
62 mammals, and its expression is highly variable across tissues [6–8]. ciRS-7 also exhibits  
63 increasing expression in neuronal differentiation models *in vitro* [9]. In zebrafish, which do not  
64 have an endogenous copy of ciRS-7 but do express miR-7, ectopic expression of the ciRS-7  
65 sequence results in a defect in midbrain development [6]. And a recent ciRS-7 knock-out mouse  
66 exhibited neuronal defects, including impaired sensorimotor gating and dysfunctional synaptic  
67 transmission [10]. In spite of these functional findings, a model for the biogenesis and regulation  
68 of ciRS-7 is lacking, and key questions remain: What is the primary transcript that is processed  
69 to produce ciRS-7? Where in the genome is the promoter for this transcript? Are there any other  
70 spliced transcripts, circular or linear, generated from this locus?

71 Correlative and mini-gene analyses have suggested that biogenesis of some circRNAs  
72 is regulated by intronic sequence flanking the circularized exon [11–13]. However, the  
73 immediate flanking sequence does not appear to control the biogenesis of ciRS-7; inserting 1 kb  
74 of the endogenous sequence flanking the ciRS-7 exon into a plasmid driven by a CMV promoter  
75 was not sufficient to produce ciRS-7 [7], implying that additional sequence is necessary for  
76 circularization. Identifying this additional sequence is an especially difficult problem in the case  
77 of ciRS-7, as the intron upstream of the circularized exon has not been described due to the  
78 lack of an annotated promoter, and unlike every other known human circular RNA, ciRS-7 is not  
79 thought to be included in a mature linear transcript, obscuring possible transcriptional start sites  
80 that would be shared with these isoforms.

81 Identifying the promoter for ciRS-7 has broad implications but is non-trivial: unlike for  
82 linear RNAs where techniques like 5' RACE can determine the transcription start site (TSS), no  
83 such approach can be used for ciRS-7 or any other circRNA. To overcome this problem and to  
84 identify the TSS of ciRS-7, we designed a new statistical method that entailed integrative  
85 analysis of chromatin modifications measure by ChIP and the RNA expression levels of ciRS-7  
86 to identifying its promoter. This is a general analytic framework that could be applied to any  
87 transcript, but we chose to focus on ciRS-7 because of the biological significance described  
88 above and because it has stood out as the only case of a human circRNA with no known linear  
89 counterpart.

90 Our analysis led us to discover that the promoters of a nearby uncharacterized locus  
91 currently annotated as a long non-coding RNA (LINC00632) were responsible for driving ciRS-7  
92 expression. In contrast to current thinking in the field, we also discovered that, in both human  
93 and mouse, the ciRS-7 exon is embedded in novel linear transcripts that include cryptic exons  
94 both up and downstream of the ciRS-7 sequence. In humans, these linear transcripts include  
95 exons overlapping with LINC00632, and the subcellular localization of transcripts from  
96 LINC00632 vary depending on the presence of the ciRS-7 sequence.

97 Together, these results support (post-)transcriptional coupling between a long-noncoding  
98 RNA and ciRS-7 and raise important functional questions about this locus. Our results also  
99 represent the first steps toward pinpointing the mechanisms underlying the regulation and  
100 biogenesis of ciRS-7.

101

## 102 **Results**

### 103 **Computational methods predict the ciRS-7 promoter region**

104 As a first step to identify the ciRS-7 promoter, we examined available chromatin  
105 immunoprecipitation sequencing (ChIP-seq) data from HeLa, HEK293, and *in vitro* differentiated  
106 neuronal cells, which exhibit a range of ciRS-7 expression, from very low (or nonexistent) in  
107 HeLa cells to very high in neurons [7–9].

108 We investigated RNA Polymerase II binding as well as the histone modifications  
109 H3K4me3 and H3K27ac, which are enriched in active promoters [14,15]. In addition, we  
110 examined H3K4me1, which is enriched in enhancers, and H3K27me3, a repressive mark  
111 enriched in silenced loci [16]. The only peaks called by MACS2, a widely used peak-calling  
112 algorithm [17], in H3K4me3, H3K27ac or RNA Polymerase II were in HEK293 and *in vitro*  
113 differentiated neuronal cells and coincided with the transcriptional start positions of LINC00632  
114 isoforms, the nearest annotated transcript upstream of ciRS-7 (Fig 1A; S1 Fig). Conversely, the  
115 repressive mark H3K27me3 was visibly enriched throughout the LINC00632 and ciRS-7 locus in  
116 HeLa cells, consistent with their lack of ciRS-7 expression, with a H3K27me3 peak called at a  
117 LINC00632 promoter (S1 Fig). This visual inspection generated the hypothesis that the  
118 LINC00632 and ciRS-7 promoters coincide, which we went on to quantitatively test.

119 If ciRS-7 shares its promoter with LINC00632, activating chromatin marks at the  
120 LINC00632 promoter and ciRS-7 expression should be positively correlated. To test this  
121 prediction, we analyzed matched ChIP-seq and RNA-seq data from 34 ENCODE tissues and

122 cell types. Specifically, we separated the ~175 kb genomic region spanning 50 kb upstream of  
123 the LINC00632 annotation to 50 kb downstream of ciRS-7 into 500 bp bins, and we computed  
124 the Pearson correlation between ciRS-7 expression and the enrichment of each of three  
125 activating marks (H3K4me3, H3K4me1, and H3K27ac) in each bin (Fig 1B). Because the null  
126 distribution of the Pearson correlation requires assumptions that do not hold for our data, we  
127 computed an empirical null distribution: for each activating mark, we computed the Pearson  
128 correlation between ciRS-7 expression and its enrichment per bin 50 kb up- and downstream of  
129 genes that should have no relationship to expression or chromatin modifications in the ciRS-7  
130 locus: ACTB, HOTAIR, and FOXO4. This empirical null distribution was used to estimate the  
131 FDR for the correlation coefficients at each bin/mark pair (S2 Fig, Methods).

132 The Pearson correlation between H3K4me3 marks and ciRS-7 expression were highest  
133 and statistically significant ( $q < 0.005$ ) at the two promoters of LINC00632 (Fig 1C, marked as  
134 'P(Distal)' and 'P(Proximal)'; S3 Fig) and H3K27ac marks in these regions were also high and  
135 statistically significant ( $q < 0.005$ ). Coincident H3K4me1 and H3K27ac marks, marks of active  
136 enhancers [18], found in this loci were also significantly correlated with ciRS-7 expression (Fig  
137 1C, marked as 'E'). No significant signal at regions more proximal to the ciRS-7 exon or  
138 upstream of annotated LINC00632 isoforms were observed, providing further statistical support  
139 that ciRS-7 expression is driven from these promoters.

140

#### 141 **Orthogonal experimental tests validate that ciRS-7 shares a promoter with LINC00632**

142 To determine whether specific activation of the LINC00632 promoters was sufficient to drive  
143 ciRS-7 expression, we used three experimental tests. First, we used the promoter-activating  
144 CRISPRa system in HeLa cells which express low or undetectable levels of ciRS-7 [7, 19] to test  
145 if ciRS-7 expression could be driven by these promoters. We designed single guide RNAs  
146 (sgRNAs) to target the two promoter regions highlighted in Fig 1C, just upstream of T1 and T3,  
147 identified as the putative promoter regions by computational analysis (See S1 File for sgRNA

148 sequences). Targeting of the CRISPRa system to either region resulted in induction of specific  
149 LINC00632 isoforms, and activating either of these promoters induced robust expression of  
150 ciRS-7 (Fig 2A), with a  $\Delta$ Ct compared to ACTB of  $\sim$ 10 (S4 Fig), although at  $\sim$ 2-3 orders of  
151 magnitude less than in the highly expressing HEK293 cells.

152 To test the hypothesis that HeLa cells are competent to express ciRS-7 at the nearest  
153 identified promoter if it is free from repressive chromatin marks, we transfected a Bacterial  
154 Artificial Chromosome (BAC O, Fig 2B), containing a genomic fragment starting upstream of the  
155 proximal LINC00632 promoter and ending  $\sim$ 50 kb downstream of ciRS-7, into HeLa cells. We  
156 detected significant expression of ciRS-7 and LINC00632 from this BAC by both RT-PCR and  
157 Northern blot after one day of transfection. As an aside, this experiment supports the model that  
158 the lack of LINC00632 and ciRS-7 expression in HeLa cells is due to chromatin modification of  
159 the locus, rather than the absence of necessary trans-acting factors and shows that all (post-  
160 )transcriptional machinery required for ciRS-7 expression are present in HeLa cells (Fig 2C,D;  
161 S5 Fig).

162 As an orthogonal test that the proximal LINC00632 promoter, and no further downstream  
163 promoter drives ciRS-7 expression, we transfected three other BACs (A-C) each containing the  
164 exonic sequence of ciRS-7, but differing in their inclusion of the proximal endogenous promoter  
165 of LINC00632 (Fig 2B,E). Because BAC O transfects more efficiently than BACs A-C, likely due  
166 to its relatively small size, we excluded it in this comparison (S6 Fig). Expression of LINC00632  
167 isoforms and ciRS-7 were correlated and highly dependent on inclusion of the LINC00632  
168 promoter, further supporting the hypothesis that ciRS-7 and LINC00632 isoforms share the  
169 same promoters (Fig 2E, S7A Fig).

170 As a final test that the dominant promoter of ciRS-7 is located in the LINC00632  
171 promoter, we created a genomic deletion in HEK293T cells, which express ciRS-7 at high levels  
172 [8], that encompasses the predicted positions of both putative promoters and encompass the

173 guide RNAs used for CRISPRa (hg38 coordinates, chrX:140,709,590-140,749,836) (see  
174 diagram in S7B Fig). We obtained one homozygous clone. ciRS-7 decreased by approximately  
175 one thousand-fold (S7B Fig), but was not completely abolished, reflecting residual low-level  
176 promoter activity in the LINC00632 locus.

177

### 178 **ciRS-7 is an exon embedded in mature human and mouse linear RNA transcripts**

179 In parallel with our computational approach to identify the promoter of ciRS-7, we tested  
180 whether gaps in the reference annotation of human exons might have missed upstream and or  
181 downstream exons spliced to and/or from ciRS-7. Indeed, spliceosomal circRNAs contain both  
182 5' and 3' splice sites flanking their exons, and in almost all known cases, circRNA exons are  
183 embedded in linear transcripts spliced to and from downstream and upstream exons [1,3].

184 We developed an analysis of RNA-seq reads capable of detecting splicing outside of  
185 annotated exonic sequences, as most algorithms that do not use annotations have high false  
186 positive and negative rates [20]. We took a transparent, simple two-step approach in an effort to  
187 establish existence of exons spliced to and from ciRS-7: In step 1, all reads are aligned to the  
188 full genome and transcriptome; in step 2, unaligned reads are broken into two pseudo paired-  
189 end reads and aligned to a 100 kb radius of ciRS-7 on chromosome X (Fig 3, upper; see  
190 Methods for details). Rather than attempting to pinpoint a genomic breakpoint, this algorithm  
191 reports all reads whose pseudo-paired ends map to the reference genome (File S2). Differences  
192 in alignment positions of the two pseudo paired-end reads are used to infer the existence of  
193 splicing events. As a positive control for this algorithm, we omitted the ciRS-7 junction from our  
194 transcriptome index and attempted to (re-)discover this junction *de novo* and other un-annotated  
195 splicing events.

196 We applied this algorithm to an H1 hESC RNA-seq dataset (Methods). 58 total reads  
197 representing possible novel junctions near the ciRS-7 locus were identified, 55 of which could  
198 be explained by the ciRS-7 circle junction. Of the three remaining reads, one represented a



199 novel junction between a cryptic donor site in the final exon of LINC00632 and the ciRS-7  
200 acceptor and a second predicted splicing between the 3' end of ciRS-7 to a cryptic downstream  
201 exon lacking any annotation (Fig 3, lower); a final read mapped internally to ciRS-7.

202 To test these novel predicted splicing events, we performed RT-PCR using primers in  
203 HEK293T (Fig 4A,B; S8 Fig), a cell line known to express ciRS-7 [8]. Direct Sanger sequencing  
204 of resulting products validated our predictions, and included two cryptic 5' splice sites in the final  
205 exon of LINC00632 paired with the annotated acceptor of ciRS-7 (S9 Fig). RT-PCR for the  
206 downstream exon yielded two splice isoforms, one of which was predicted computationally and  
207 the other using an acceptor ~1 kb upstream (Fig 4C, S9 Fig, S10 Fig). qPCR for three variants:  
208 LINC00632, the LINC00632-ciRS-7 transcript, and ciRS-7 in HEK293T showed that ciRS-7 was  
209 ~250-fold more abundant than the LINC00632-ciRS-7 transcript and about ~50-fold more  
210 abundant than LINC00632 (S11 Fig). LINC00632-ciRS-7 and LINC00632 transcripts were also  
211 RNase R sensitive, as expected for linear transcripts (S12 Fig).

212 In an effort to test transcriptional co-regulation between LINC00632 and LINC00632-  
213 ciRS-7, we profiled 136 ENCODE cell lines and tissues to quantify both (a) the total expression  
214 of ciRS-7 sequence compared to LINC00632 and (b) the splice variants ciRS-7 and ciRS-7-  
215 LINC00632 (S13 fig). This analysis revealed that (a) ciRS-7 is more highly expressed in  
216 muscle and fat tissues than in the brain (based on TPM values); (b) the expression of  
217 LINC00632-ciRS-7 splicing versus ciRS-7 expression is tissue-specifically regulated; and (c)  
218 while relative expression levels of LINC00632 and ciRS-7 have a dynamic range across several  
219 orders of magnitude, their expression was highly correlated across all cell lines and tissues we  
220 analyzed (Pearson  $r=0.57$ , Spearman  $r=0.41$ , both  $p$ -vals  $\ll 10e-6$ ). Together, this analysis  
221 suggests both transcriptional coupling and differential regulation of splicing between LINC00632  
222 and ciRS-7.

223 Many features of ciRS-7 expression are conserved in mammals [6]. We hypothesized  
224 that its embedding in linear transcripts was similarly conserved, despite the current thinking that

225 ciRS-7 lacks a mature linear transcript in mammals [6–8,10,21]. To test this hypothesis, we  
226 applied the the same analytic approach used above in human cells to mouse (Methods). It also  
227 predicted the existence of novel cryptic exons flanking ciRS-7, variants that were confirmed by  
228 RT-PCR in mouse brain (Fig 4D,E). In addition, it predicted a new circRNA resulting from back-  
229 splicing of a cryptic exon 15 kb downstream of ciRS-7 to its annotated acceptor, which we  
230 validated by PCR and sequencing (Fig 4D,E). qPCR for the linear junction between the novel  
231 upstream exon and ciRS-7 showed this isoform was RNase R sensitive, evidence of it being  
232 linear, and ~250 fold less abundant than ciRS-7 (S14 Fig). In this experiment, ciRS-7 was also  
233 strongly sensitive to RNase R, as has been reported by others [3]. While exonic sequences  
234 flanking ciRS-7 in linear transcripts have no detectable primary sequence homology between  
235 human and mouse, such conservation is not necessarily expected for long non-coding RNAs  
236 [22].

237 Our RNA-seq analysis focused on establishing the existence of cryptic exons spliced to  
238 and from the ciRS-7 exon, rather than complete annotation of all existing transcripts. We sought  
239 to estimate transcript diversity in this locus by exploratory RT-PCR in human cells. This work  
240 uncovered isoforms that splice directly from LINC00632 to cryptic exons downstream of ciRS-7,  
241 including skipping of the ciRS-7 sequence and direct splicing into the downstream internal exon  
242 of ciRS-7 (Fig 4E, S10 Fig). We attempted several PCRs not guided by the RNA-seq analysis  
243 described above; in general, these PCR reactions were negative, evidence against a model of  
244 pervasive noisy splicing in the locus, and evidence that we had identified the dominant  
245 transcripts expressed from the LINC00632 locus.

246

#### 247 **ciRS-7 sequence has potential circRNA-independent regulatory effects**

248 To test for potential differential regulation of ciRS-7, LINC00632, and LINC00632-ciRS-7  
249 linear transcripts, we profiled their subcellular localization by fractionating nuclear and  
250 cytoplasmic RNA from HEK293T. Using XIST and ACTB as controls for enrichment of nuclear

251 and cytoplasmic fractions, respectively, qPCR demonstrated that, relative to ciRS-7, LINC00632  
252 and LINC00632-ciRS-7 were enriched in the nucleus with increasing degrees (~9 and 25-fold  
253 respectively vs. ciRS-7), suggesting that the ciRS-7 sequence impacts the steady-state  
254 localization of transcripts containing it (Fig 4F).

255 One hypothesis generated by this work is that the expression of ciRS-7 is directly or  
256 indirectly tied to the expression of other transcripts in this locus. The recent study that knocked  
257 out the ciRS-7 sequence in mouse allows us to begin to test this hypothesis [10].

258 While we have not experimentally validated the transcriptional start of the ciRS-7 pre-  
259 mRNA in mouse, there are many similarities to the human locus: the nearest upstream gene is  
260 an uncharacterized lincRNA (C230004F18Rik) and the nearest H3K4me3 (a mark of promoter  
261 activity) and RNA Polymerase II peaks to ciRS-7 occur at the transcriptional start of this lincRNA  
262 (Fig 5A). In addition, transcription of this locus appears to begin at the C230004F18Rik  
263 promoter, proceeding continuously past the ciRS-7 locus (Fig 5A). Taken together, these data  
264 suggest that the transcriptional start of the ciRS-7 pre-mRNA in mouse occurs at an upstream  
265 lincRNA, namely C230004F18Rik, as it does in human. This raises the question: is the  
266 abundance of C230004F18Rik affected by the presence or absence of the ciRS-7 sequence?

267 To test this, we re-analyzed data from mouse ciRS-7 knockout experiment to determine  
268 if deletion of the ciRS-7 sequence resulted in differential expression of C230004F18Rik. We  
269 discovered that, when collapsing across all brain regions profiled, among differentially  
270 expressed genes that are statistically significant, C230004F18Rik is the third-most upregulated  
271 gene in the ciRS-7 KO vs. WT (Fig 5B,C; 2.44 fold induction, p-adjusted 1.21e-6). The most  
272 upregulated gene is Fos (3.44 fold, p-adjusted 2.95e-5), and the second-most upregulated gene,  
273 C030023E24Rik (3.03 fold, p-adjusted 1.10e-9), is an uncharacterized transcript located roughly 5.5  
274 kb downstream of ciRS-7 and encompassed by the transcriptional read-buildup (Fig 5A-C).

275 In the hippocampus, C230004F18Rik was the most significantly changed gene after  
276 ciRS-7 by p-value, with 3.11 fold higher expression (p-adjusted 2.51e-13), followed by

277 C030023E24Rik (3.4 fold higher, p-adjusted 6.29e-13) (S15 Fig). And C230004F18Rik was  
278 significantly upregulated in all tissues examined except the cortex (S15 Fig) (the lack of  
279 significant differential expression was presumably due to higher variability between replicates  
280 than in other tissues, see Fig 5C). This consistent and large effect of ciRS-7 knock-out on  
281 C230004F18Rik is consistent with a direct regulatory impact of the ciRS-7 sequence on  
282 C230004F18Rik abundance.

283

## 284 **Discussion**

285         The embedding of ciRS-7 sequence in cryptic exons changes the view of the  
286 exceptionality of ciRS-7 as circRNA lacking a linear host transcript: its transcriptional regulation  
287 is similar to other circRNAs that are embedded in linear ‘host’ RNAs. In human, we have  
288 computationally and experimentally demonstrated that LINC00632 and ciRS-7 share the same  
289 promoters, and have strong support for a similar model in mouse from: (a) RNA-seq analysis  
290 showing strong expression effects on flanking linear Riken transcripts from ciRS-7 KO; (b) RNA-  
291 seq and PCR data linking ciRS-7 to cryptic up- and downstream exons; and (c) continuous  
292 RNA-seq signal across the locus starting from the upstream gene C230004F18Rik, through  
293 ciRS-7, and into the downstream transcript C030023E24Rik. Together, these data support the  
294 model that C230004F18Rik, ciRS-7 and C030023E24Rik represent a single transcriptional  
295 locus.

296         Because of the syntenic hosting of ciRS-7 in linear transcripts, and to simplify  
297 nomenclature, we propose renaming the uncharacterized gene LINC00632 (respectively Riken  
298 transcripts) to **A**lternatively **S**pliced **I**Nto **C**iRS-7 (ASINC, respectively Asinc in mouse); we call  
299 the linear variants of these non-coding RNAs lacking ciRS-7 sequence ASINC.1 and those  
300 containing it ASINC.2.

301           The transcriptional and splicing machinery necessary for ciRS-7 expression is likely not  
302 brain specific, and rather is general: BACs containing a fragment of the LINC00632 locus that  
303 includes its promoter can express ciRS-7 when introduced to HeLa cells (which have little to no  
304 endogenous expression of ciRS-7). ciRS-7 expression may be primarily regulated at the level of  
305 chromatin modification of the locus, either at the newly-discovered promoters or putative  
306 enhancers.

307           Our work has implications for the assigned functions of ciRS-7. Despite intensive study,  
308 the promoter and mechanisms regulating ciRS-7 expression have remained mysterious. To  
309 date, experiments studying the function of the ciRS-7 sequence have made what was a  
310 reasonable simplifying assumption that the only transcripts containing the ciRS-7 sequence are  
311 circular [8,10]. However, interpretation of past and future studies assigning function to the ciRS-  
312 7 sequence must be made in light of its origination from and potential functions in linear  
313 transcripts. This includes a recent study of a mouse model where the ciRS-7 exon was deleted  
314 [10]. Our analysis of the ciRS-7 locus shows that knock-out of this exon results in an  
315 upregulation of both the upstream and downstream Riken transcripts, C230004F18Rik and  
316 C030023E24Rik. The magnitude and significance of these effects compared to other gene  
317 expression changes suggests it was a direct effect of the ciRS-7 knockout, and raises the  
318 possibility that some functions assigned to the knock-out animal could be due to increases in  
319 expression of the Riken transcripts.

320           There are multiple models that could explain the increased expression of the up-and  
321 downstream-Riken transcripts ciRS-7-null mice. If ciRS-7 transcription originates from a  
322 promoter shared with C230004F18Rik, as is the case for human transcription, then ciRS-7  
323 would originate from the same linear pre-spliced transcript as the Riken transcripts. This raises  
324 the possibility that generating linear transcripts containing the ciRS-7 sequence destabilizes  
325 them or that the act of circRNA biogenesis itself leads to destabilization of the residual linear  
326 transcript. These explanations would predict upregulation of the Riken transcripts when the

327 ciRS-7 exon is deleted. Another model is that ciRS-7 could directly or indirectly affect  
328 expression of the Riken transcripts through regulatory networks. For example, ciRS-7 may  
329 sequester or compete for splicing factors (e.g., nuclear Ago2 [23]), or ciRS-7 expression may  
330 affect the expression of other genes that are involved in direct regulation of the Riken  
331 transcripts.

332         The view that ciRS-7 directly regulates its host transcript is supported by our finding that  
333 ASINC transcripts are differentially localized in the cell depending on their inclusion of the ciRS-  
334 7 sequence. This suggests active regulation of or by the transcripts potentially through factors  
335 that bind the sequence in ciRS-7, and generates the hypothesis that ciRS-7-containing linear  
336 ASINC.2 has different functions in the nucleus than the ciRS-7 circRNA in the cytoplasm.  
337 Indeed, the cytoplasmic ciRS-7 circles have been shown to function by sequestering mir-7[6,7],  
338 a mechanism that unlikely to be employed by nuclear ASINC.2. Further study of transcripts in  
339 the entirety of the locus and their regulation may reveal new functions for ciRS-7 and this locus  
340 as a whole.

341         This work also lays a foundation for the field to begin to dissect transcriptional regulation  
342 and biogenesis of the ciRS-7 locus. Regulation of alternative splice variants in the ASINC locus,  
343 transcription factor binding patterns, and three-dimensional interactions between the promoters  
344 and putative enhancers we identified can now be analyzed across different cell types and  
345 throughout development. In addition, the analysis presented here could be generalized to other  
346 genes whose promoters are not well-annotated. For example, another well-known circRNA with  
347 no annotated promoter is derived from the Sry gene in mouse, which is circularized in mature  
348 adult testes but expresses an unspliced mRNA in the developing genital ridge that governs sex  
349 determination [2]. It has been hypothesized, though remains untested, that the promoter for the  
350 Sry circRNA uses a separate promoter from the linear mRNA[24]. Other highly-expressed  
351 circRNAs in human are also derived from the first exon of an annotated mRNA [25]. Given our  
352 results, we predict that the promoters of these circular RNAs may have been misidentified

353 and/or misannotated in the genome and may be associated with cryptic up- or downstream  
354 splice junctions. Future analyses that comprehensively characterize transcription and splicing  
355 at individual loci will be required to fully understand the regulatory mechanisms underlying  
356 circRNA biogenesis.

357

## 358 **Methods**

359

### 360 **RNA-seq analysis for detection of novel splice isoforms**

361 Raw RNA-seq reads from SRR5048080 (human) and SRR1785046 (mouse) were downloaded  
362 from the SRA. Reads were mapped and analyzed using KNIFE [27]. Reads failing to align  
363 (“unaligned”) by KNIFE were used in a simple custom mapping approach to identify novel  
364 splicing events within a single read: single reads were split into pseudo-pairs (k-mers) by taking  
365 the first 20 mer in the unaligned read and the remaining k-mer defined by the start position O  
366 (30 for mouse and 50 for human because of differing input read lengths) and the minimum of  
367 O+20 and the remaining read length after trimming (see supplemental perl script in S2 File).  
368 Only reads where each pseudo-pair > 18 nt were used for analysis. These pseudo-paired end  
369 reads, which actually came from the same single read were then realigned separately as pairs  
370 using bowtie2 to a custom index made by the following sequences:

371

```
372 >mm10_knownGene_uc012hid.1 range=chrX:61083246-61285558 5'pad=0 3'pad=0 strand=-  
373 repeatMasking=none
```

```
374 >hg38_knownGene_uc004fbf.2 range=chrX:140683176-140884660 5'pad=0 3'pad=0 strand=+  
375 repeatMasking=none
```

376

377 Pairs of pseudo-reads mapping on the same strand were identified and used for further  
378 analysis. While pseudo-alignments are used in some RNA-seq analysis approaches, few  
379 algorithms are capable of achieving precise de novo transcript recovery due to their high false  
380 positive rates and unknown false negative rates. This approach differs from other algorithms  
381 because it (a) does not use a seed and extend approach; and (b) reads are aligned to a 100 kb  
382 radius of ciRS-7 rather than the reference genome, in principle, preventing misalignment of true  
383 ASINC reads to other loci. The complete analysis, the R script used along with output is  
384 provided in S2 File. Although our analysis is likely to include other novel splicing in the locus, we  
385 focused our attention on queries for reads that supported a splice from an un-annotated location  
386 upstream of the acceptor in ciRS-7 and from the donor in ciRS-7 to an un-annotated  
387 downstream exon using criteria on the position of discordant pseudo-paired end mappings (see  
388 R script). An example of the reads that supported these events were (in human:  
389 SRR5048129.92905492\_2774860 (upstream exon); SRR5048080.59411858\_2626289  
390 (downstream exon) and in mouse: SRR1785046.9826290 (upstream exon);  
391 @SRR1785046.13497132 HWI-ST1148:158:C3UJCACXX:2:2112:5228:93046 length=50  
392 (downstream exon backsplicing to ciRS-7 acceptor).

393

394

### 395 **ENCODE data analysis**

396 For ChIP-seq analysis of histone modifications, processed narrowPeak files aligned to hg19  
397 were downloaded from the ENCODE portal. All samples for ChIP-seq were selected with the  
398 following filtering criteria, based on annotations in the metadata annotation file downloaded from  
399 [https://www.encodeproject.org/metadata/type=Experiment&replicates.library.biosample.donor.org](https://www.encodeproject.org/metadata/type=Experiment&replicates.library.biosample.donor.organism.scientific_name=Homo+sapiens/metadata.tsv)  
400 [ganism.scientific\\_name=Homo+sapiens/metadata.tsv](https://www.encodeproject.org/metadata/type=Experiment&replicates.library.biosample.donor.organism.scientific_name=Homo+sapiens/metadata.tsv): “Assay” == “ChIP-seq”, “File format” ==  
401 “bed narrowPeak”, “Output type” == “peaks”. Only samples with availability of H3K4me1,  
402 H3K4me3, H3K9me3, H3K27ac, H3K27me3, and H3K36me3 were selected. For RNA-seq



403 analysis, raw reads were similarly downloaded from the ENCODE portal. Total RNA-seq  
404 experimental data were filtered based on the following criteria: “File format” == “fastq”, “Output  
405 type” == “reads”, “Biosample treatment” == null, “Library depleted in” == “rRNA”, “Biosample  
406 subcellular fraction term name” == null. The lists of cell types for which satisfactory ChIP-seq  
407 and RNA-seq data were cross-referenced to identify the list of 34 cell types for which data was  
408 analyzed.

409  
410 ChIP-seq narrowPeak file were processed according to the following pipeline: the enrichment  
411 scores of any peak calls in genomic 500bp bins spanning 50 kb up- and down-stream of the  
412 genomic locus were identified using bedtools intersect -wao -a [genomic\_bins.bed] -b  
413 [narrowPeak file]. If multiple peaks were called in a given bin, the peak with the highest  
414 enrichment score was reported using bedtools merge -c [enrichment column] -o max. The  
415 absence of a peak was reported as a 0, which could indicate either complete lack of signal or  
416 insufficient signal over input to call a significant peak in the ENCODE pipeline. Fold enrichment  
417 values for replicate ChIP-seq experiments performed on the same cell type were averaged for a  
418 given genomic bin.

419  
420 RNA-seq reads were quantified using kallisto quant against a custom kallisto index consisting of  
421 RefSeq cDNA transcripts, exclusive of any covering the ASINC/CiRS-7 locus, plus sequences  
422 corresponding to individual ASINC/ciRS-7 exons transcribed from both the plus and minus  
423 strands[28]. For single-ended data, the quant --[fr/rf]-stranded -b 0 -t 2 -l 200 -s 20 --single  
424 command was used, using either --fr-stranded or --rf-stranded depending on the order of the  
425 input files. For paired-ended data, the quant --[fr/rf]-stranded -b 0 -t 2 command was used, again  
426 using either --fr-stranded or --rf-stranded depending on the input read files.

427 Expression data was quantified as  $1000 \times \text{tpm} / \text{transcript length}$ . Expression values (RPKM) were  
428 averaged across replicates for a given cell type for a given transcript.

429  
430 Our methodology for identifying novel promoters is described below and fundamentally differs  
431 from typical informatic approaches such as machine-learning algorithms that use hidden  
432 variables or neural networks. These approaches have unknown statistical properties such as  
433 effective degrees of freedom or an easily-modeled null distribution for the final test statistic.  
434 Below, we describe a method that is conceptually simple and statistically transparent in that the  
435 null distribution can be easily computed, and our statistic of interest, numerically related to the  
436 active promoter, can be referred to this distribution to obtain an empirical p value.  
437 Decoy CHIP marks on chromosomes 7, 12, and X, corresponding to regions +/- 50 kb upstream  
438 and downstream of the annotated TSS and transcription stop sites respectively in the ACTB,  
439 FOXO4, and HOTAIR loci, were used as an empirical null for determining the false-discovery  
440 rate (FDR) for correlations between CHIP enrichment in putative promoters and enhancers (S3  
441 File). We computed an FDR as follows. For each mark, we computed the correlation between  
442 ciRS-7, measured as exonic TPM, and chromatin mark enrichment for bins on chromosomes 7,  
443 12, and X, and generated the empirical distribution of these correlations (S5 File). Then for each  
444 mark, we determined the correlation value above which 0.5% of the data in the empirical null fell  
445 ( $q < 0.005$ ), and assigned a correlational threshold on the basis of this. We model-checked our  
446 assumptions for the empirical null distribution by showing that there was no significant  
447 correlation or anticorrelation between ciRS-7 and ACTB (Pearson  $r = 0.31$ ,  $p$ -value = 0.08),  
448 ciRS-7 and HOTAIR (Pearson  $r = -0.13$ ,  $p$ -value = 0.45), or ciRS-7 and FOXO4 (Pearson  
449  $r = 0.12$ ,  $p$ -value 0.48) as such effects could distort our null model. Heatmaps were generated by  
450 averaging CHIP-seq peak enrichment for a given 500bp genomic bin across all sample  
451 replicates, and computing the Pearson correlation coefficient of CHIP enrichment against RNA-  
452 seq expression for a given cell type.

453 For genome browser screenshots, pre-processed data was obtained from the ENCODE portal  
454 (see S6 File) and visualized using the UCSC genome browser. Data were shown as the mean  
455 value over a smoothing window of 6 pixels.

456

#### 457 **Quantification of novel junctions and isoforms from ENCODE RNA-seq data sets**

458 370 paired-end RNA-sequencing data sets made from ribosomal RNA-depleted total RNA were  
459 downloaded from the ENCODE portal. This set included some samples for which there were  
460 biological or technical replicates, representing 136 different cell/tissue types. FASTQ files were  
461 quantified against a kallisto index made from ENSEMBL release 89 ncRNA and cDNA fasta files  
462 using default parameters (kallisto index -k 31). A second custom kallisto index was created  
463 from 40bp junctional sequences within the ASINC locus containing 20bp sequence upstream of  
464 a splice site and 20bp sequence downstream of a splice site. This index was also created using  
465 default parameters. Paired end data was downloaded and processed using kallisto quant -b 0  
466 against both indexes. tpm (transcripts per million) outputs from the reference transcriptome  
467 were aggregated, and for samples with multiple sequencing data sets, tpms were averaged  
468 across replicates. For gene-level analysis of the ASINC locus, the five transcripts  
469 corresponding to 'LINC00632' in ENSEMBL release 89 were summed to determine gene-level  
470 expression of the locus. For the custom junctional index, est\_counts output for each sample  
471 from kallisto quant were normalized to sequencing depth calculated from the reference  
472 transcriptome and averaged across replicates. Only junctions with reads supported by at least  
473 one sample were reported.

474

#### 475 **Analysis of mouse ciRS-7 knock-out data**

476 Data from Piwecka et al. [10] were downloaded from the NCBI Sequence Read Archive using  
477 the tool fastq-dump. Data were quantified using kallisto quant --single -l 200 -s 30 against a  
478 kallisto index built using default parameters. The kallisto index was generated from a

479 concatenation of cDNA and ncRNA from ENSEMBL release 90 with the addition of the  
480 C030023E24Rik sequence, which was not present in the ENSEMBL fasta file. Kallisto  
481 quantification was imported into R using tximport [29] and differential gene expression analysis was  
482 performed using DESeq2 with default parameters [30]. Aggregation of transcript annotations to  
483 perform gene-level analysis was performed with the tx2gene parameter of tximport based on  
484 transcript-gene pairing information parsed from the ENSEMBL fasta files. Unless otherwise noted,  
485 cutoffs for significance were based genes having an adjusted p-value (“padj”) lower than 0.05.

486

### 487 **Bacterial Artificial Chromosomes (BACs) and plasmid vectors**

488 BACs were purchased from Thermo Fisher Scientific (Waltham, MA) in the case of BAC CTD-  
489 2166E9, and from the BACPAC Resources Center (Children’s Hospital Oakland Research  
490 Institute, CA) in the case of all other BACs. BACs were purified from E. coli using the  
491 Nucleobond Xtra BAC Maxi Kit (Macherey-Nagel, Duren, Germany). SP-dCAS9-VPR (Addgene  
492 ID: 63798) was provided by the Qi lab[19], and the sgRNA-encoding plasmid along with the  
493 Cas9 plasmid, pMCB306 (Addgene ID: 89360) and lentiCas9-Blast (Addgene ID: 52962)  
494 respectively, were gifts from Michael Bassik [31,32]. Guides were cloned into pMCB306 cloned  
495 into the BlnI/BstXI site using annealed oligos with the appropriate sticky ends (S1 File).

496

### 497 **BAC Fingerprinting**

498 To ensure BACs had the proper insert, 3 µg of each BAC were digested with 12 units of Ban I  
499 (NEB, Ipswich, MA) in the manufacturer’s buffer for 1.5 hours at 37°C. The digests were then  
500 heated to 65°C for 20 min. The digestion fragments were separated by loading 750 ng per lane  
501 on a 1% LE Agarose (GeneMate) gel with 0.5X TAE running buffer. The DNA was visualized  
502 with ethidium bromide staining. Simulated BAC fingerprints were created using SnapGene  
503 software (from GSL Biotech) (S16 Fig).

504

## 505 **Transfections**

506 All transfections were performed in 6-well plates using 7.5  $\mu$ L of Lipofectamine 3000 and 2.5  $\mu$ g  
507 of total DNA per well according to the manufacturer's protocol. Unless noted otherwise, cells  
508 were harvested 24 hours after transfection.

509 For CRISPRa experiments, we introduced 1.25  $\mu$ g of the SP-dCAS9-VPR plasmid and 1.25  $\mu$ g  
510 of combined sgRNA plasmids (four for each promoter tested) (see S1 File for sequences). Cells  
511 were harvested 48 hours after transfection.

512 For CRISPR genomic deletions, two sgRNA vectors (pMCB306) with guides targeting a ~55 kb  
513 deletion of the X chromosome were transfected into HEK293T cells at a total mass of 1.25 mg  
514 per transfection along with 1.25 mg of a vector expressing Cas9 (lentiCas9-Blast). The  
515 sequences for these guides can be found in S1 file. The cells were incubated for two days prior  
516 to being sorted into single cells by GFP fluorescence as a measure of transfection, which is also  
517 expressed on pMCB306. After two weeks, colonies were screened by PCR for the presence of  
518 the deletion.

519

## 520 **Nuclear/Cytoplasmic Fractionation**

521  $1-2 \times 10^6$  293T cells were fractionated for nuclear/cytoplasmic RNA using the PARIS kit (Thermo  
522 Fisher Scientific) according to the manufacturer's instructions. 0.25-0.5  $\mu$ g of RNA of each  
523 fractionated sample was used in the RT prior to qPCR, using an equal RNA mass for both the  
524 nuclear and cytoplasmic fractions in each experiment.

525

## 526 **RNA Purification (primary tissue)**

527 Snap-frozen total brain tissue from a 12-week old C57BL/6 pregnant female mouse was  
528 homogenized in TRIZOL and the aqueous phase was purified on Purelink RNA column with on-  
529 column DNase treatment.

530

531 **RNA Purification (cell lines)**

532 Cells were lysed directly in tissue culture plates by the direct addition of TRIzol reagent (Thermo  
533 Fisher Scientific). The manufacturer's protocol was followed with the following modifications:  
534 after isolation of the aqueous phase, 1 volume of 100% EtOH was added to the sample, and  
535 then the entire volume was applied to and spun through a RNA Clean & Concentrator-5 column  
536 (Zymo, Irvine, CA). The column protocol was performed as per the manual's instructions starting  
537 from the application of the RNA Prep Buffer.

538

539 **RNase R treatment**

540 1 µg of RNA was treated with 5 U RNase R (Epicentre, Madison, WI) (or no enzyme in the case  
541 of the mock) in 10 µL total reaction volume at 37 C for 30 min. 1 µL 1 mM EDTA, 10 mM  
542 dNTPs, and 25 uM random hexamers were then added to the sample and the sample was then  
543 heated to 65 C for 5 min to denature RNA structures. The RNA was then reverse transcribed  
544 without purification with the addition of 4 µL 5x supplement buffer (250 mM Tris pH 8, 125 mM  
545 KCl, 15 mM MgCl<sub>2</sub>) and 2 µL of 0.1 M DTT to provide the necessary conditions for the RT  
546 reaction.

547

548 **RT-PCR and qPCR**

549 Total RNA was reverse transcribed with random hexamers using 100 U Maxima Reverse  
550 Transcriptase (Thermo Fisher Scientific) according to the manufacturer's instructions.  
551 Endpoint PCRs were performed using DreamTaq DNA Polymerase (Thermo Fisher Scientific,  
552 Waltham, MA). For all PCR reactions, 1.5 µl of the unpurified RT-reaction was used per 50 µl  
553 reaction volume. All RT-PCR reactions were performed using the recommended cycling  
554 protocol for 35 cycles.  
555 qPCR reactions were assembled as 10 µl reactions using AccuPower 2X GreenStar qPCR  
556 Master Mix (Bioneer, Daejeon, Korea) with 0.3 µl of template used per reaction. qPCRs were

557 performed on an ABI 7900HT using following cycling protocol: 50 °C for 20 min, 95 °C for 10 min,  
558 (95 °C for 15 s and 60 °C for 60 s) × 45 cycles, followed by a dissociation stage.

559

## 560 **Northern Blot**

561 Northern Blots were performed using 5 µg of total RNA per well using the NorthernMax kit  
562 (Thermo Fisher Scientific) according to the manufacturer's recommendations. Single-stranded  
563 DNA oligos were used as probes and were purchased from IDT (Coralville, IA). Probe  
564 sequences can be found in S1 File.

565

## 566 **Supporting Information**

567 **S1 Fig. Additional ChIP-seq plots across the ciRS-7 locus from neuronal and HeLa cells.**

568

569 **S2 Fig. Heatmap of pearson correlations between chip marks at null loci and ciRS-7**

570 **expression:** ACTB (top), HOTAIR (middle), FOXO4 (bottom). Coordinates reported are from the  
571 hg19 genome build.

572

573 **S3 Fig. Sample correlational plots of chip mark enrichment vs ciRS-7 expression at the distal**  
574 **promoter region.**

575

576 **S4 Fig. CRISPR activation of LINC00632 promoters induces the expression of ciRS-7 in HeLa**

577 **cells.** qPCR measurement of ciRS-7 expression relative to actin. Error bars represent the  
578 standard deviation of biological replicates.

579

580 **S5 Fig. RNase R sensitivity of transcripts generated from BAC O vs HEK293T. LINC00632**

581 isoform T3 was measured in both cases. Error bars represent the standard deviation of  
582 biological replicates.

583

584 **S6 Fig. Transfection efficiency of the BACs** relative to BAC O quantified by DNA-qPCR of  
585 BAC backbone DNA from HeLa cells transfected with the BAC. Error bars represent the  
586 standard deviation of biological replicates (with error propagated from BAC O).

587

588 **S7 Fig. qPCR quantification of ciRS-7 and LINC00632 isoform T3 in HeLa transfected with**  
589 **BACs and HEK mutants.** (A) RNA expression in HeLa transfected with BACs A, B, and C. All  
590 values have been normalized to those for BAC A, and error bars represent the standard  
591 deviation of biological replicates (with error propagated from BAC A). (B) RNA expression of  
592 isoforms in wild-type HEK293T and in a cloned strain of HEK293T in which the putative ciRS-7  
593 promoters have been deleted.

594

595 **S8 Fig. Additional PCRs to determine connectivity between exons of LINC00632 and ciRS-**  
596 **7.**

597

598 **S9 Fig. Sanger sequencing traces for novel linear ciRS-7 junctions in human.**

599

600 **S10 Fig. Products from TOPO cloning** of bands in Fig 2B--*left* (lanes 2 and 3).

601

602 **S11 Fig. qPCR  $\Delta$ Ct of human isoforms.** Higher values indicate lower expression. Error bars  
603 represent standard deviation of biological replicates.

604



605 **S12 Fig. RNase R sensitivity of ciRS-7, LINC00632, and LINC00632-CDR1AS isoforms in**  
606 **HEK293T.**

607  
608 **S13 Fig. Quantification of ciRS-7 and LINC00632 transcripts across ENCODE tissues and cell**  
609 **lines. (A) LINC00632 and ciRS-7 gene-level quantification, transcripts per million reads (tpm) (B)**  
610 **ciRS-7 backsplice and LINC00632-ciRS-7 junctional counts per million reads**

611  
612 **S14 Fig. qPCR  $\Delta$ Ct of mouse isoforms (Top)  $\Delta$ Ct (vs GAPDH) for ciRS-7 linear and circular**  
613 **isoforms and (Bottom) RNase R sensitivity of transcripts in mouse brain. Error bars represent**  
614 **standard deviation of technical replicates.**

615  
616 **S15 Fig. Volcano plots of log fold-change ciRS-7 KO vs WT in each brain region (Methods).**

617  
618 **S16 Fig. BAC quality checks. (A) Simulated and experimental BanI digest of the four BACs**  
619 **used in this study. The agreement of these footprints supports that BAC inserts are as reported**  
620 **and have not been significantly altered by bacterial recombination. (B) Sanger sequencing of**  
621 **the 5' ends of BAC genomic inserts. The vector sequence is in lowercase; the genomic insert**  
622 **sequence is in uppercase.**

623  
624 **S1 File. PCR primers, Northern probes, and sgRNA sequences.**

625 **S2 File. RNA-seq scripts and output for novel isoform discovery.**

626 **S3 File. Table of ChIP-seq peak enrichment and RNA expression levels.**

627 **S4 File. Quantification of RNA expression in ENCODE data.**

628 **S5 File. Calculation of empirical FDR for ChIP-seq and RNA-seq correlations.**

629 **S6 File. ENCODE accession numbers used in genome browser screenshots.**

630

## 631 **Acknowledgments**

632 We thank Peter Wang, Peter Sarnow, Zoe Davis and Robert Bierman for discussion and critical  
633 comments that improved our work; Roozbeh Dehghannasiri for help with analysis, the Krasnow  
634 and Herschlag Labs for discussions, sharing reagents and space; the Qi and Bassik labs for  
635 plasmids, and Inga Jarmoskaite for her help with radiation safety training.

## 636 **References**

- 637 1. Salzman J, Gawad C, Wang PL, Lacayo N, Brown PO (2012) Circular RNAs are  
638 the predominant transcript isoform from hundreds of human genes in diverse cell types.  
639 PLoS ONE 7: e30733. doi:10.1371/journal.pone.0030733.
- 640 2. Capel B, Swain A, Nicolis S, Hacker A, Walter M, et al. (1993) Circular transcripts  
641 of the testis-determining gene Sry in adult mouse testis. Cell 73: 1019–1030.  
642 doi:10.1016/0092-8674(93)90279-Y.
- 643 3. Jeck WR, Sorrentino JA, Wang K, Slevin MK, Burd CE, et al. (2013) Circular  
644 RNAs are abundant, conserved, and associated with ALU repeats. RNA 19: 141–157.  
645 doi:10.1261/rna.035667.112.
- 646 4. Nigro JM, Cho KR, Fearon ER, Kern SE, Ruppert JM, et al. (1991) Scrambled  
647 exons. Cell 64: 607–613. doi:10.1016/0092-8674(91)90244-S.
- 648 5. Wang PL, Bao Y, Yee M-C, Barrett SP, Hogan GJ, et al. (2014) Circular RNA is  
649 expressed across the eukaryotic tree of life. PLoS ONE 9: e90859.  
650 doi:10.1371/journal.pone.0090859.
- 651 6. Memczak S, Jens M, Elefsinioti A, Torti F, Krueger J, et al. (2013) Circular RNAs  
652 are a large class of animal RNAs with regulatory potency. Nature 495: 333–338.  
653 doi:10.1038/nature11928.
- 654 7. Hansen TB, Jensen TI, Clausen BH, Bramsen JB, Finsen B, et al. (2013) Natural  
655 RNA circles function as efficient microRNA sponges. Nature 495: 384–388.  
656 doi:10.1038/nature11993.
- 657 8. Hansen TB, Wiklund ED, Bramsen JB, Villadsen SB, Statham AL, et al. (2011)  
658 miRNA-dependent gene silencing involving Ago2-mediated cleavage of a circular  
659 antisense RNA. EMBO J 30: 4414–4422. doi:10.1038/emboj.2011.359.
- 660 9. Rybak-Wolf A, Stottmeister C, Glažar P, Jens M, Pino N, et al. (2015) Circular  
661 rnas in the mammalian brain are highly abundant, conserved, and dynamically expressed.  
662 Mol Cell 58: 870–885. doi:10.1016/j.molcel.2015.03.027.

- 663 10. Piwecka M, Glažar P, Hernandez-Miranda LR, Memczak S, Wolf SA, et al.  
664 (2017) Loss of a mammalian circular RNA locus causes miRNA deregulation and affects  
665 brain function. *Science* 357. doi:10.1126/science.aam8526.
- 666 11. Liang D, Wilusz JE (2014) Short intronic repeat sequences facilitate circular RNA  
667 production. *Genes Dev* 28: 2233–2247. doi:10.1101/gad.251926.114.
- 668 12. Kramer MC, Liang D, Tatomer DC, Gold B, March ZM, et al. (2015)  
669 Combinatorial control of *Drosophila* circular RNA expression by intronic repeats, hnRNPs,  
670 and SR proteins. *Genes Dev* 29: 2168–2182. doi:10.1101/gad.270421.115.
- 671 13. Ivanov A, Memczak S, Wyler E, Torti F, Porath HT, et al. (2015) Analysis of  
672 intron sequences reveals hallmarks of circular RNA biogenesis in animals. *Cell Rep* 10:  
673 170–177. doi:10.1016/j.celrep.2014.12.019.
- 674 14. Liang G, Lin JCY, Wei V, Yoo C, Cheng JC, et al. (2004) Distinct localization of  
675 histone H3 acetylation and H3-K4 methylation to the transcription start sites in the human  
676 genome. *Proc Natl Acad Sci U S A* 101: 7357–7362. doi:10.1073/pnas.0401866101.
- 677 15. Wang Z, Zang C, Rosenfeld JA, Schones DE, Barski A, et al. (2008)  
678 Combinatorial patterns of histone acetylations and methylations in the human genome.  
679 *Nat Genet* 40: 897–903. doi:10.1038/ng.154.
- 680 16. Barski A, Cuddapah S, Cui K, Roh T-Y, Schones DE, et al. (2007) High-  
681 resolution profiling of histone methylations in the human genome. *Cell* 129: 823–837.  
682 doi:10.1016/j.cell.2007.05.009.
- 683 17. Zhang Y, Liu T, Meyer CA, Eeckhoute J, Johnson DS, et al. (2008) Model-based  
684 analysis of ChIP-Seq (MACS). *Genome Biol* 9: R137. doi:10.1186/gb-2008-9-9-r137.
- 685 18. Creyghton MP, Cheng AW, Welstead GG, Kooistra T, Carey BW, et al. (2010)  
686 Histone H3K27ac separates active from poised enhancers and predicts developmental  
687 state. *Proc Natl Acad Sci U S A* 107: 21931–21936. doi:10.1073/pnas.1016071107.
- 688 19. Chavez A, Scheiman J, Vora S, Pruitt BW, Tuttle M, et al. (2015) Highly efficient  
689 Cas9-mediated transcriptional programming. *Nat Methods* 12: 326–328.  
690 doi:10.1038/nmeth.3312.
- 691 20. Engström PG, Steijger T, Sipos B, Grant GR, Kahles A, et al. (2013) Systematic  
692 evaluation of spliced alignment programs for RNA-seq data. *Nat Methods* 10: 1185–1191.  
693 doi:10.1038/nmeth.2722.
- 694 21. Lasda E, Parker R (2016) Circular RNAs Co-Precipitate with Extracellular  
695 Vesicles: A Possible Mechanism for circRNA Clearance. *PLoS ONE* 11: e0148407.  
696 doi:10.1371/journal.pone.0148407.
- 697 22. Johnsson P, Lipovich L, Grandér D, Morris KV (2014) Evolutionary conservation  
698 of long non-coding RNAs; sequence, structure, function. *Biochim Biophys Acta* 1840:  
699 1063–1071. doi:10.1016/j.bbagen.2013.10.035.
- 700 23. Taliaferro JM, Aspden JL, Bradley T, Marwha D, Blanchette M, et al. (2013) Two  
701 new and distinct roles for *Drosophila* Argonaute-2 in the nucleus: alternative pre-mRNA

- 702 splicing and transcriptional repression. *Genes Dev* 27: 378–389.  
703 doi:10.1101/gad.210708.112.
- 704 24. Hacker A, Capel B, Goodfellow P, Lovell-Badge R (1995) Expression of *Sry*, the  
705 mouse sex determining gene. *Development* 121: 1603–1614.
- 706 25. Zhang X-O, Wang H-B, Zhang Y, Lu X, Chen L-L, et al. (2014) Complementary  
707 sequence-mediated exon circularization. *Cell* 159: 134–147.  
708 doi:10.1016/j.cell.2014.09.001.
- 709 26. Farh KK-H, Grimson A, Jan C, Lewis BP, Johnston WK, et al. (2005) The  
710 widespread impact of mammalian MicroRNAs on mRNA repression and evolution.  
711 *Science* 310: 1817–1821. doi:10.1126/science.1121158.
- 712 27. Szabo L, Morey R, Palpant NJ, Wang PL, Afari N, et al. (2015) Statistically based  
713 splicing detection reveals neural enrichment and tissue-specific induction of circular RNA  
714 during human fetal development. *Genome Biol* 16: 126. doi:10.1186/s13059-015-0690-5.
- 715 28. Bray NL, Pimentel H, Melsted P, Pachter L (2016) Near-optimal probabilistic  
716 RNA-seq quantification. *Nat Biotechnol* 34: 525–527. doi:10.1038/nbt.3519.
- 717 29. Sonesson C, Love MI, Robinson MD (2015) Differential analyses for RNA-seq:  
718 transcript-level estimates improve gene-level inferences. [version 2; referees: 2  
719 approved]. *F1000Res* 4: 1521. doi:10.12688/f1000research.7563.2.
- 720 30. Love MI, Huber W, Anders S (2014) Moderated estimation of fold change and  
721 dispersion for RNA-seq data with DESeq2. *Genome Biol* 15: 550. doi:10.1186/s13059-  
722 014-0550-8.
- 723 31. Han K, Jeng EE, Hess GT, Morgens DW, Li A, et al. (2017) Synergistic drug  
724 combinations for cancer identified in a CRISPR screen for pairwise genetic interactions.  
725 *Nat Biotechnol* 35: 463–474. doi:10.1038/nbt.3834.
- 726 32. Sanjana NE, Shalem O, Zhang F (2014) Improved vectors and genome-wide  
727 libraries for CRISPR screening. *Nat Methods* 11: 783–784. doi:10.1038/nmeth.3047.
- 728
- 729
- 730
- 731
- 732
- 733

734 **Figures**

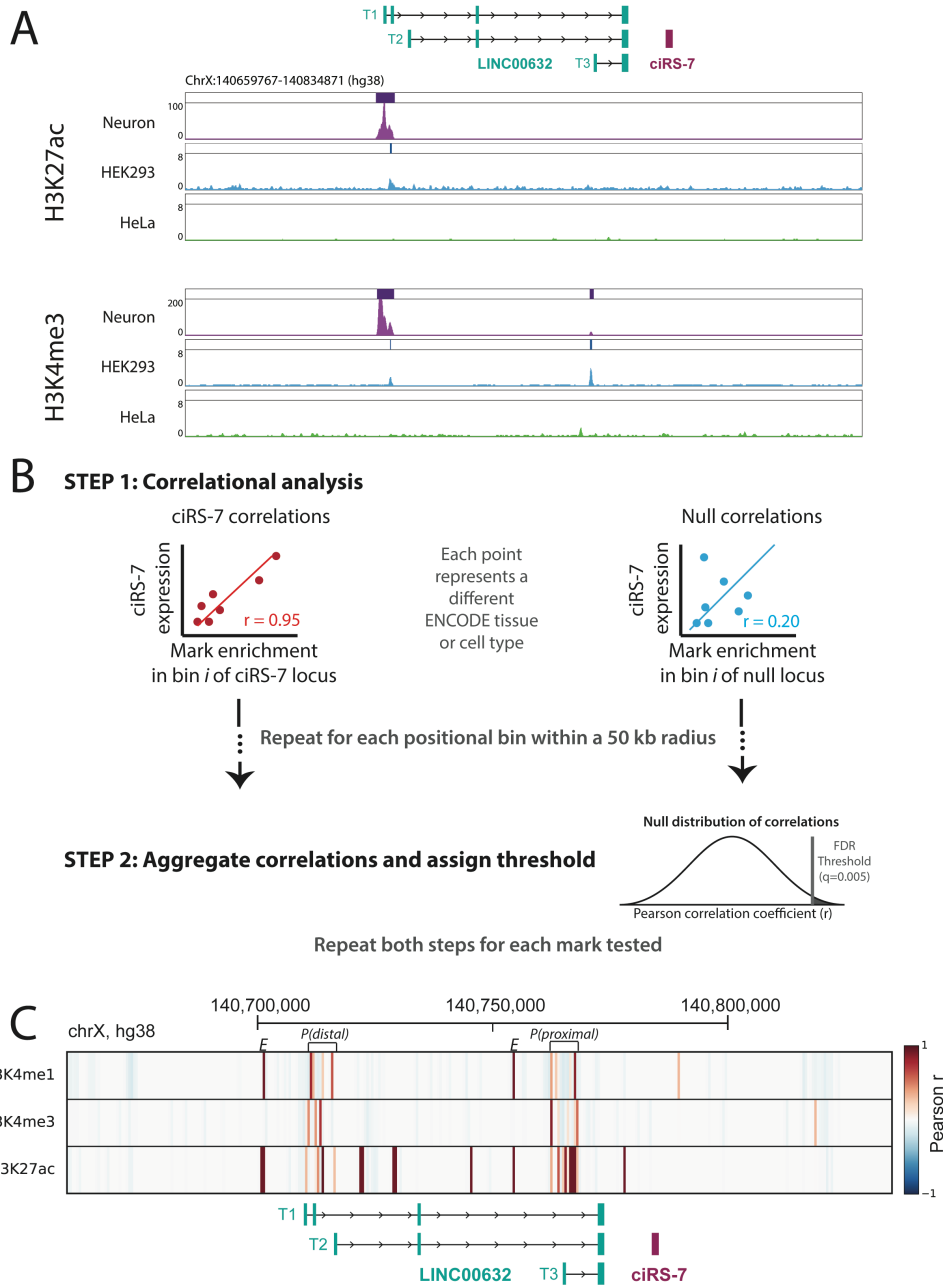

735

736 **Fig 1.** Computational and statistical analysis predict ciRS-7 shares a promoter with annotated  
 737 LINC isoforms. **(A)** H3K27ac and H3K4me3 peaks across the ciRS-7 locus and nearby genomic  
 738 region in *in vitro*-differentiated neurons, HEK293, and HeLa cells. **(B)** Schematic depicting  
 739 analysis correlating chromatin mark enrichment near the ciRS-7 locus with ciRS-7 expression in  
 740 RNA seq data. To estimate a false discovery rate, null correlations are computed using chIP-  
 741 enrichment at disparate regions of the genome with no relationship to ciRS-7 (ACTB, FOXO4,  
 742 and HOTAIR). Then, using these null correlations, a null distribution is created from which a  
 743 false discovery rate can be estimated. **(C)** Heatmap correlation (Pearson  $r$ ) between strand-

744 specific ciRS-7 expression and enrichment of histone marks across the ciRS-7 locus and  
 745 surrounding genomic region (spanning from 50 kb upstream of LINC00632 and 50 kb  
 746 downstream of ciRS-7). Correlations are plotted in 500 nucleotide bins, and a depiction of  
 747 annotated genes is shown below. Our FDR threshold ( $q < 0.005$ ) is satisfied for correlations  
 748 greater than 0.35 for H3K4me1 (top 6 correlated bins), 0.45 for H3K4me3 (top 4 correlated  
 749 bins), and 0.75 for H3K27ac (top 14 correlated bins) (See File S5). Putative promoters regions  
 750 are annotated with brackets and the letter 'P'. Putative enhancers are marked with the letter 'E'.  
 751

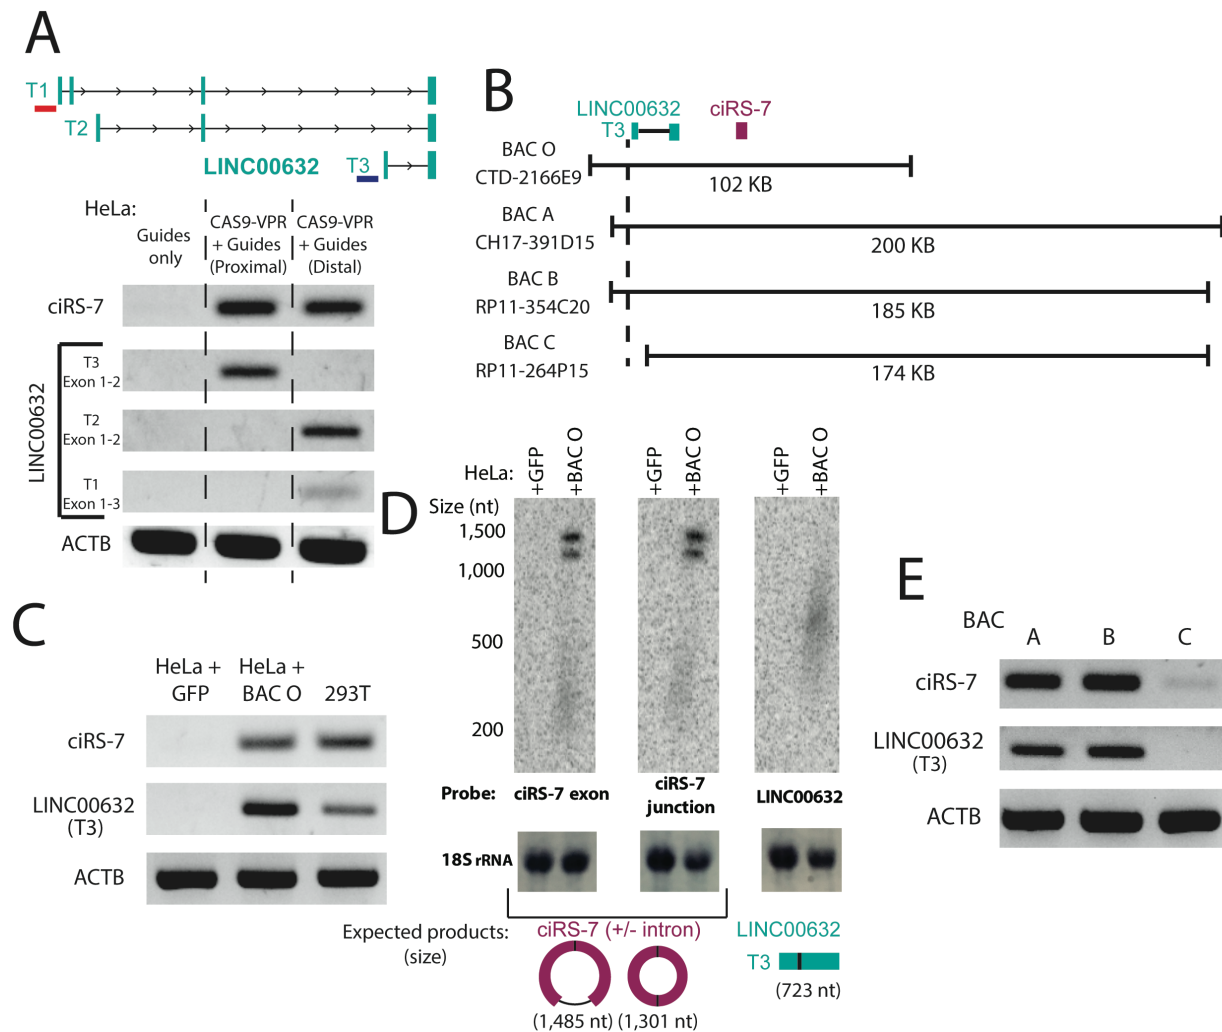

752

753

754 **Fig 2.** Experimental approaches confirm the identity of the ciRS-7 promoter. **(A)** RT-PCR for  
 755 ciRS-7 and LINC00632 transcripts in HeLa (+/- Cas9-VPR activation) with guide RNAs  
 756 targeting distal and proximal promoters identified in Fig 1C. The approximate targeted locations  
 757 of the proximal and distal guide RNAs are shown with a blue and red bar, respectively, in the  
 758 diagram shown above the gel. **(B)** Schematic of BAC inserts with respect to the ciRS-7 and  
 759 LINC00632 genes. **(C)** RT-PCR and **(D)** Northern blot for ciRS-7 and LINC00632 transcripts  
 760 generated after BAC O transfection. The appearance of two bands in the ciRS-7 Northern blots  
 761 are due to alternative splicing of an intron contained within the ciRS-7 exonic sequence. **(E)** RT-  
 762 PCR for ciRS-7 and LINC00632 transcripts from HeLa cells transfected with BACs A-C.

763

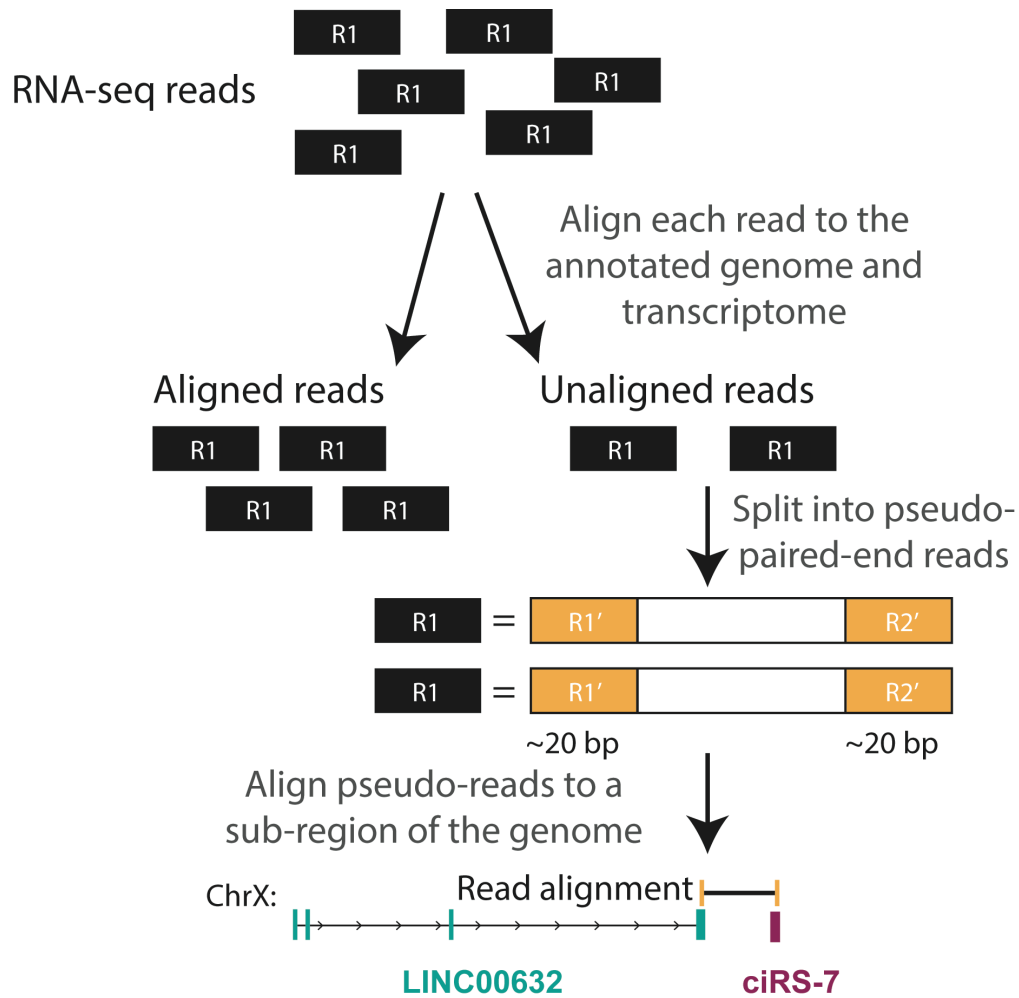

764

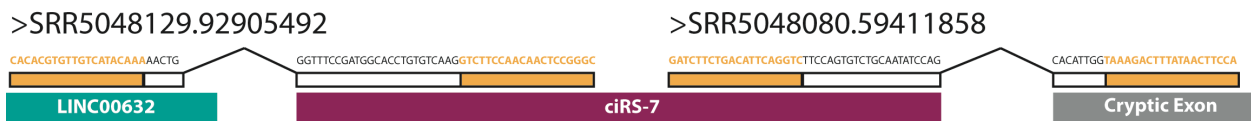

765 **Fig 3.** (Upper) Schematic outlining RNA-seq split read mapping approach. (Lower) Unannotated  
 766 linear splicing is predicted up- and downstream of the ciRS-7 exon. Reads supporting these  
 767 junctions are shown above the locus. Note, features are not drawn to scale.  
 768

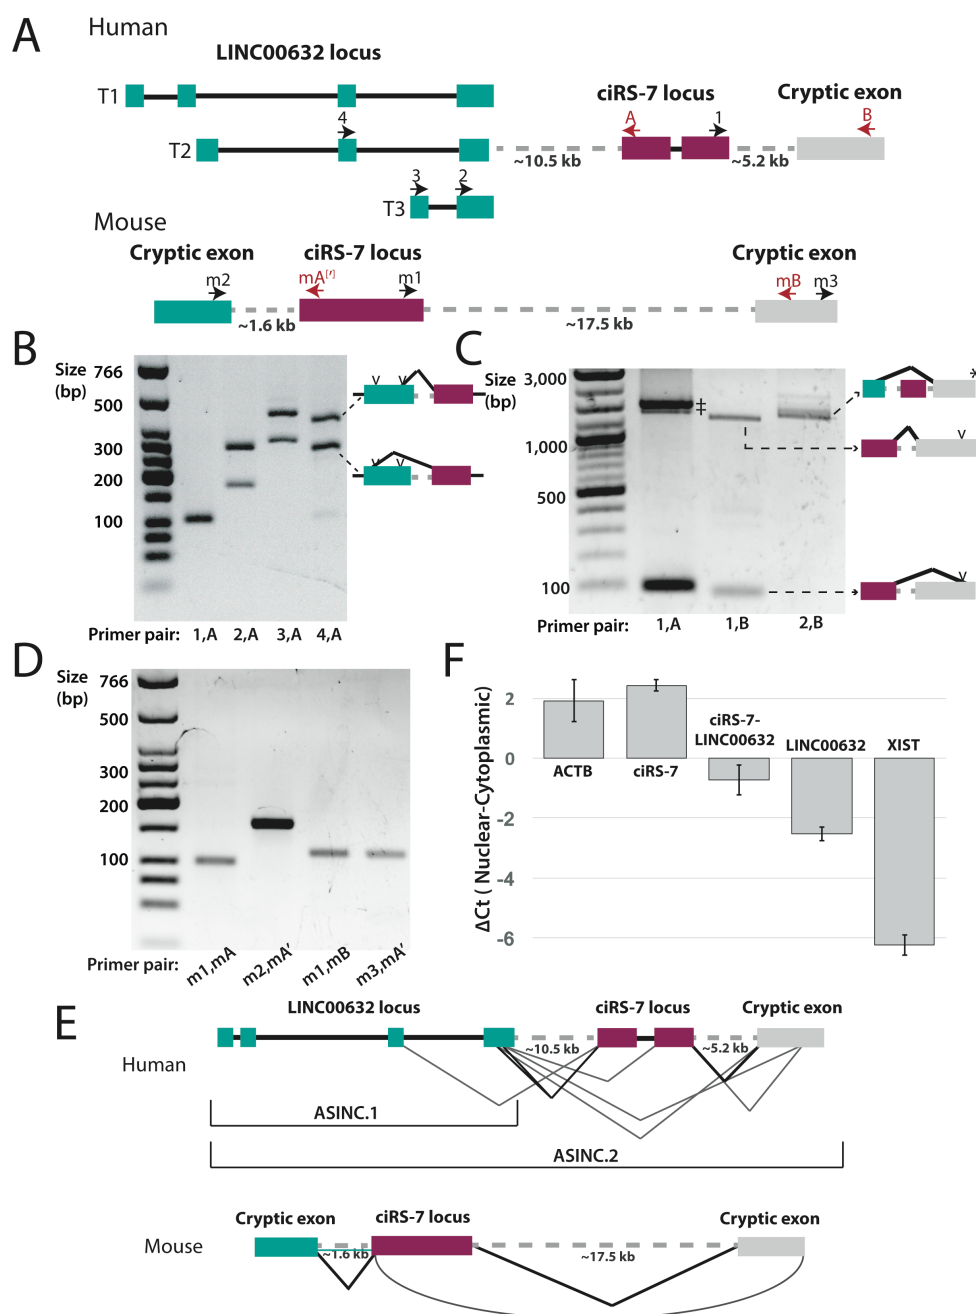

769

770 **Fig 4.** ciRS-7 exonic sequence is included in linear transcripts. **(A)** Schematic of the locus  
 771 including PCR primers used in this study. Dotted lines indicate approximate positions of newly  
 772 discovered introns. Figure is not drawn to scale. **(B)** RT-PCR of circular and linear ciRS-7 splice  
 773 products from HEK293T. (1,A): control PCR for ciRS-7; other lanes: LINC00632 exons spliced  
 774 to the ciRS-7 exonic sequence: the two bands in each of these lanes represent the products  
 775 formed when the two possible splice sites in the final exon of LINC00632 are used (see diagram  
 776 on the right of gel). **(C)** PCR of spliced products that include cryptic exons downstream of ciRS-  
 777 7. (‡) represents rolling circle ciRS-7 PCR products with and without intron retention. (\*) Other  
 778 products were also identified (see S7 Fig). **(D)** RT-PCR of circular and linear ciRS-7 splice  
 779 products from mouse brain RNA. mA and mA' bind to approximately the same region but have  
 780 slightly different sequence (see S1 File). **(E)** Examples of novel splicing observed in the human



781 and mouse ASINC loci. Curved line in mouse indicates a backsplice. **(F)** qPCR quantification of  
 782 nuclear-cytoplasmic fractionated RNA from HEK293T. Error bars represent the standard  
 783 deviation of biological replicates.

784

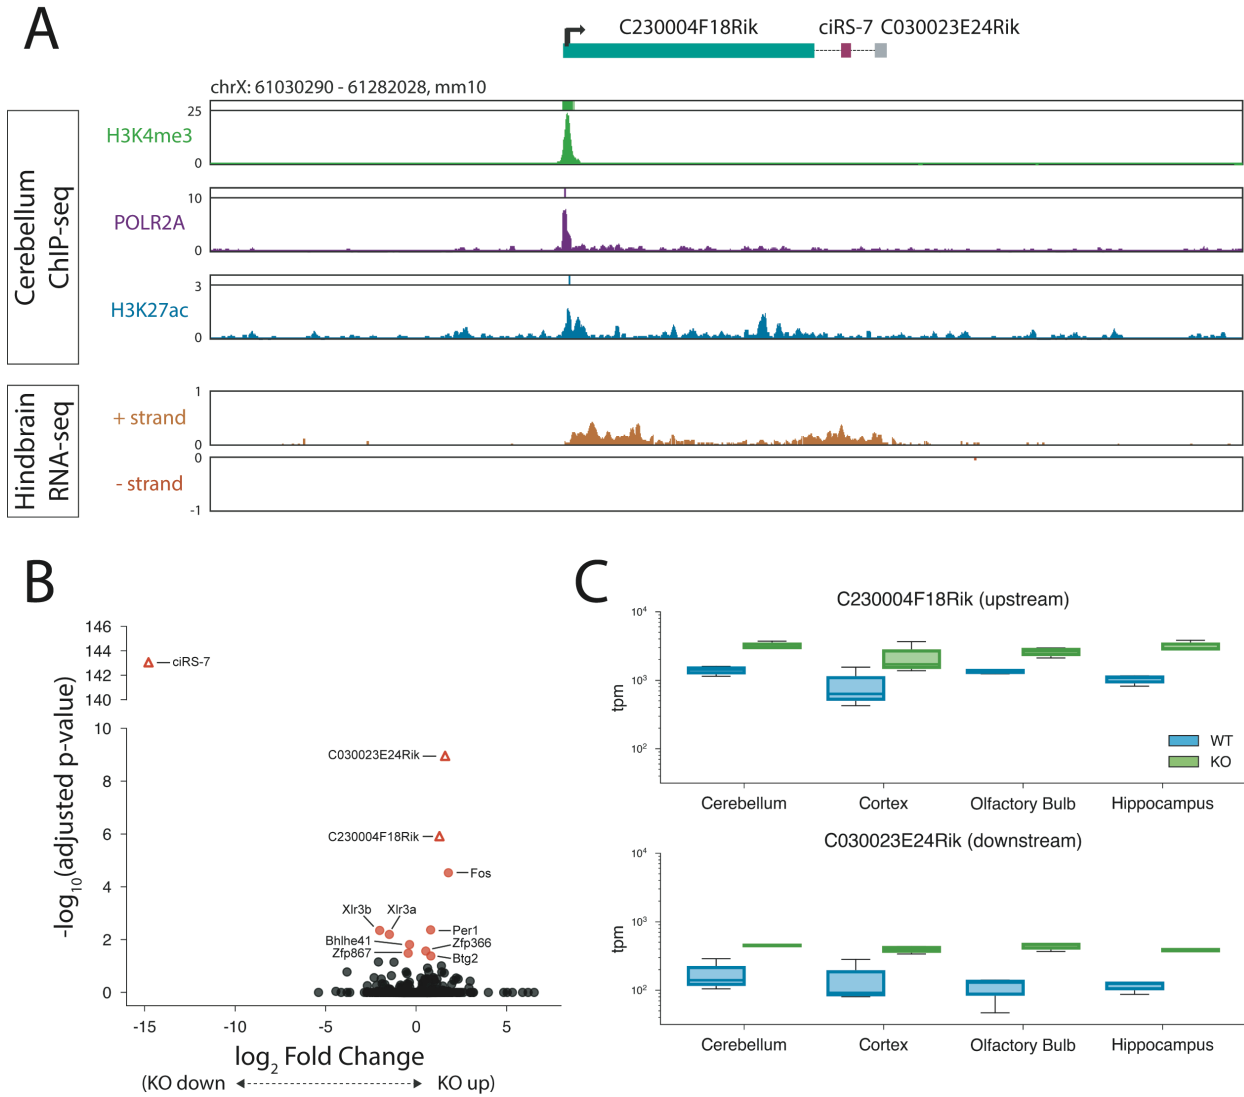

785

786 **Fig 5.** Up- and downstream transcripts are upregulated in ciRS-7 KO mouse. **(A)** ChIP-seq and  
 787 RNA-seq tracks for mouse cerebellum and hindbrain in the genomic region surrounding the  
 788 ciRS-7 locus. **(B)** Volcano plots of log fold-change ciRS-7 KO vs WT collapsed across four brain  
 789 regions. **(C)** Box plots depicting tpm of C230004F18Rik (top) and C030023E24Rik (bottom) in  
 790 WT and ciRS-7 KO mice across four brain regions.

791
